# Supplementary material for: Halofantrine up-regulates ATP6V0D2 mediating cytotoxic autophagy in glioblastoma and its mechanism
Source: Research Square preprint supplement (doi:10.21203/rs.3.rs-4335913/v1), 2024-05-13
Supplement: Supplementary file 1 [file 27d132f26a2f690547206eca.xlsx]

## Sheet: 病例
Pathology number	name	sex	age	Admission number	Presenting doctor	Date received	Submitting unit	Submitting department	Reviewing physician	Report to the doctor	Pathological diagnosis	Report date
2325055	***	male	66 years old	0000885520	Zeng Tongfei	2023-10-02 15:37	This court	neurosurgery	Jin Meihua	Yang Chaoyue/Chen Yueyuan	For samples sent after left temporal lobe freezing, see 62302603. (left temporal lobe occupying) increased tumor cell density, marked atypia, microangiogenesis and flaky-like necrosis, consistent with high-grade glioblastoma, NOS, CNS WHO grade 4. It is recommended that adult glioma molecular detection be further classified. Immunohistochemical results: GFAP (+), Olig-2 (+), ATRX (+), IDH1 (-), E…	2023-10-07 15:11
2322011	***	male	Sixty years old	0000871413	Wang Qilin	2023-08-29 09:38	This court	neurosurgery	Jin Meihua	Fu Lijuan	Specimens submitted for examination after right basal ganglia freezing (see pathology No. 62302230 for details) (right basal ganglia tissue) Microscopic findings showed diffuse distribution of heterogeneous cells, microangiogenesis and necrosis, consistent with high-grade glioma, considered glioblastoma, NOS, CNS WHO Grade 4. Molecular testing for adult glioma is recommended for further diagnosis.	2023-09-01 19:57
2321605	***	female	39 years old	0000867408	Wang Qilin	2023-08-24 09:35	This court	neurosurgery	Jin Meihua	Huang Zhiyi	(insular space) A large number of heterotypic cells with necrosis were found in the submitted tissue, which, combined with clinical history, is consistent with glioblastoma, IDH wild-type, CNS WHO grade 4. Immunohistochemical results: GFAP (+), Olig-2 (+), ATRX (+), P53 (strong +, 90%), IDH1 (-), Ki67 (+, 60%). (basal lobe occupation) The cell density of brain tissue was slightly higher, and scat…	2023-08-30 17:52
2317213	***	male	54 years old	0000876405	Wei Shuyang	2023-07-15 10:01	This court	neurosurgery	Jin Meihua	Zhou Haiyan	(right frontal lobe occupying lesion) microscopic tumor cells showed diffuse invasive growth, obvious atypia, frequent nuclear division, necrosis and microangiogenesis, morphology consistent with high-grade glioblastoma (glioblastoma), NOS, CNS WHO grade 4, it is recommended to add adult glioma molecular detection for further integrated diagnosis. Immunohistochemical results: Tumor cells GFAP (+)…	2023-07-19 15:00
2316636	***	male	73 years old	0000616225	Yang Baohua	2023-07-11 10:17	This court	neurosurgery	Jin Meihua	Fu Lijuan	Specimens submitted after left temporo-parietal deep space freezing (see pathology No. 62301661) : The tumor cells showed diffuse and invasive growth, obvious atypia, visible mitosis, necrosis and microangiogenesis. The morphology was consistent with high-grade glioma, glioblastoma, NOS, CNS WHO grade 4, and molecular detection of adult glioma was recommended for further integrated diagnosis. Imm…	2023-07-14 10:16
2312305	***	male	Fifty years old	0000690323	Yan Changzhi	2023-05-26 10:04	This court	neurosurgery	Zhou Yingqiong	Yue Wanrong/Jin Jinli	For samples to be examined after freezing of frontal lobe masses, see No. 62301207; (left frontal lobe occupation) Microscopic examination showed that the tumor cells were dense, the cells had obvious atypia, visible mitotic images and necrosis, and unclear microangiogenesis, which was consistent with high-grade glioblastoma (glioblastoma), NOS, CNS WHO grade 4. It is recommended to perform molec…	2023-05-31 19:55
2312129	***	male	53 years old	0000869861	Liao Hongzhan	2023-05-24 15:59	This court	neurosurgery	Zhou Yingqiong	Zhou Haiyan	(right temporal lobe occupation) microscopic findings of the tumor cells diffuse invasive growth, obvious atypia, easy to see the nuclear division, pseudopalisade necrosis, microangiogenesis and focal calcification, in line with high-grade glioblastoma (glioblastoma), NOS, CNS WHO grade 4, it is recommended to add adult glioma molecular detection to assist diagnosis. Immunohistochemical results: …	2023-05-27 09:38
2309853	***	male	69 years old	0000865489	Yang Baohua	2023-04-29 12:00	This court	neurosurgery	Jin Meihua	Yue Wanrong	Specimens of frozen right frontal lobe mass for examination, see 62300955; (right temporal lobe occupying lesion) The tumor cells showed atypia under microscope, focal microangiogenesis and necrosis. Considering high-grade glioblastoma (glioblastoma), NOS, CNS WHO grade 4, molecular detection of adult glioma is recommended to assist diagnosis. Immunohistochemical results: GFAP (+), Olig-2 (+), ID…	2023-05-06 17:32
2301066	***	female	55 years old	0000855594	Yan Changzhi	2023-01-18 15:46	This court	neurosurgery	Zheng Jinhua	Qiu Xiang	(right temporal lobe occupation) microscopic tumor cells diffuse invasive growth, obvious atypia, visible mitotic image, morphology consistent with high-grade glioblastoma (glioblastoma), NOS, CNS WHO grade 4. A molecular test for adult glioma is recommended to assist in diagnosis. Immunohistochemical results: Tumor cells GFAP (+), Olig-2 (+), IDH1 (-), ATRX (partial +), EMA (-), H3.3G34V (-), P5…	2023-01-20 16:20
2300953	***	male	Sixty years old	0000806496	Mo Rufen	2023-01-17 09:44	This court	neurosurgery	Zheng Jinhua	Wu Jinxiao	(left parietal lobe occupation) microscopic tumor cells showed diffuse infiltrating growth, obvious atypia, frequent nuclear division, local microangiogenesis and pseudoparilateral necrosis, morphology consistent with high-grade glioblastoma (glioblastoma), NOS, CNS WHO grade 4. A molecular test for adult glioma is recommended to assist in diagnosis. Immunohistochemical results: Tumor cells GFAP …	2023-01-19 11:48
2300174	***	female	58 years old	0000854114	Liao Hongzhan	2023-01-04 15:46	This court	neurosurgery	Jin Meihua	Qiu Xiang	(left temporal lobe occupation) microscopic tumor cells showed diffuse invasive growth, obvious atypia, frequent nuclear division, pseudopalisade necrosis, morphology consistent with high-grade glioma (glioblastoma), NOS, CNS WHO grade 4. A molecular test for adult glioma is recommended to assist in diagnosis. Immunohistochemical results: tumor cells GFAP (+), Olig-2 (+), IDH1 (-), ATRX (+), EMA …	2023-01-06 17:50
2233790	***	male	55 years old	0000853908	Chen Ruizhe	2022-12-31 11:01	This court	neurosurgery	Zheng Jinhua	Yang Huiting	(right cerebellar hemisphere occupying) large tumor cell atypia can be seen under the microscope, false palisade necrosis and microangiogenesis can be seen, which is consistent with high-grade glioblastoma (glioblastoma), NOS, CNS WHO grade 4, it is recommended to add molecular detection of adult glioma to assist diagnosis. Immunohistochemical results: Tumor cells GFAP (+), S100 focus (weak +), V…	2023-01-05 14:51
2231925	***	male	53 years old	0000784629	Deng Mei	2022-11-23 10:01	This court	Radiotherapy department	Jin Meihua	Yang Huiting	(left temporal lobe occupying) large tumor cell heterotypes, pseudopalisade necrosis and microangiogenesis were seen under microscope, combined with clinical history and immunohistochemical results, consistent with recurrence of high-grade glioblastoma (glioblastoma), NOS, CNS WHO Ⅳ. Immunohistochemical results: Tumor cells GFAP (+), Olig-2 (+), MAP2 (+), Nestin (+), ATRX (+), IDH1 (focal +), P53…	2022-11-25 16:47
2231384	***	male	33 years old	0000806130	Zhu Lin	2022-11-16 09:57	This court	Day treatment area	Jin Meihua	Wu Zhidong	(left frontal glioma) tumor cells are densely distributed, oval or short fusiform cells, obvious atypia, giant cell formation, microangiogenesis and necrosis, combined with immunohistochemical results and clinical history consistent with high-grade glioblastoma (glioblastoma), CNS WHO4 grade. Immunohistochemical results: tumor cells GFAP (+), Olig-2 (+), IDH1 (-), ATRX (+), P53 (strong +, 70%), M…	2022-11-21 17:30
2228878	***	female	58 years old	0000847113	Tang Can	2022-10-21 15:42	This court	neurosurgery	Jin Meihua	Wu Zhidong	(right thalamic occupying) tumor cells are densely distributed, some are epithelioid, necrosis and microangiogenesis are visible, consistent with high-grade glioblastoma (glioblastoma), NOS, CNS WHO grade 4, and molecular detection of adult glioma is recommended.	2022-10-27 17:15
2228250	***	female	23 years old	0000845845	Yan Changzhi	2022-10-15 11:05	This court	neurosurgery	Jin Meihua	Huang Zhiyi	Immunohistochemical results: Tumor cells GFAP (+), Olig-2 (+), IDH1 (-), ATRX (+), P53 (varying strength +, 80%), MAP2 (+), H3K27Me3 (+), H3K27M (-), CXORF67 (-), SALL4 (-), Ki67 (+, 70%).	2022-10-19 12:07
2228245	***	male	44 years old	0000846302	Luo Jiali	2022-10-15 11:04	This court	neurosurgery	Jin Meihua	Huang Zhiyi	(left temporal lobe occupying lesion) microscopic findings of dense distribution of heterogeneous tumor cells, epithelioid, large sheet necrosis, consistent with high-grade glioblastoma (glioblastoma), NOS, CNS WHO grade 4, it is recommended to add adult glioma molecular detection. Immunohistochemical results: GFAP (+), Olig-2 (-), MAP2 (+), ATRX (+), S100 (partially weak +), IDH1 (-), INI-1 (+),…	2022-10-18 17:52
2225499	***	male	Forty-seven years old	0000842652	Lengda Shou	2022-09-14 15:56	This court	neurosurgery	Zhou Yingqiong	Wu Zhidong	(right frontal lobe space occupying lesion) microscopic tumor cells diffuse growth, obvious atypia, easy to see nuclear division, microangiogenesis and necrosis, consistent with high-grade astrocytoma, prone to glioblastoma, NOS, CNS WHO is level 4. It is recommended that adult glioma molecular detection be further classified. Immunohistochemical results: Tumor cells GFAP (+), Olig-2 (+), ATRX (+…	2022-09-16 17:56
2221365	***	male	Seventy-two years old	0000837707	Liao Hongzhan	2022-08-03 16:13	This court	neurosurgery	Jin Meihua	Wang Shanhuan	(right temporal lobe occupation) microscopic findings showed dense distribution of heterogeneous tumor cells, frequent mitotic images, microangiogenesis and necrosis, consistent with high-grade glioma, the shape was considered glioblastoma, NOS, CNS WHO grade 4, it is recommended to add adult glioma molecular detection. Immunohistochemical results: 1#GFAP (+), Olig-2 part (+), ATRX (+), EMA plasm…	2022-08-09 11:16
2218943	***	male	Fifty years old	0000812254	Fan Xiaoguang	2022-07-12 09:53	This court	neurosurgery	Jin Meihua	Huang Zhiyi	(right parietal lobe occupation) Microscopic findings of heterogeneous tumor cells densely distributed, cell morphology is diverse, multinucleoma giant cells can be seen, nuclear division, necrosis and microangiogenesis can be seen, consistent with high-grade glioma, the morphology is considered to be glioblastoma, NOS, CNS WHO grade 4. It is recommended that adult glioma molecular detection be f…	2022-07-15 11:15
2218473	***	male	Seventy-two years old	0000833827	Lengda Shou	2022-07-07 10:00	This court	neurosurgery	Jin Meihua	Huang Zhiyi	(left parietal lobe occupation) microscopic findings of heterogeneous tumor cells densely distributed, visible nuclear division, visible necrosis and microangiogenesis, consistent with high-grade glioma, morphology considered glioblastoma, NOS, CNS WHO grade 4, it is recommended to add adult glioma molecular detection for further diagnosis. Immunohistochemical results: GFAP (+), ATRX (+), Olig-2 …	2022-07-11 16:13
2217696	***	male	Nine years old	0000833028	Wei Shuyang	2022-06-29 09:46	This court	neurosurgery	Jin Meihua	Huang Zhiyi	(left frontal lobe glioma) microscopic examination showed dense distribution of heterogeneous tumor cells, local multinucleoma giant cells, microangiogenesis and necrosis. Considering high-grade glioma, glioblastoma, NOS,CNS WHO grade 4, molecular detection of pediatric glioma is recommended for further integrated diagnosis. Immunohistochemical results: GFAP (+), Olig-2 (+), IDH1 (-), ATRX part (…	2022-07-01 17:29
2217004	***	male	58 years old	0000831679	Zheng Huaping	2022-06-21 15:30	This court	neurosurgery	Jin Meihua	Zhao Kaixuan	(right frontotemporal lobe occupation) microscopic findings showed dense distribution of heterogeneous tumor cells, frequent mitotic images, microangiogenesis and necrosis, consistent with high-grade glioma, the shape was considered glioblastoma, NOS, CNS WHO grade 4, it is recommended to add adult glioma molecular detection. Immunohistochemical results: GFAP (+), Olig-2 (+), IDH1 (-), ATRX (+), …	2022-06-24 14:36
2215389	***	male	39 years old	0000788439	Jiang Cailing	2022-06-06 09:37	This court	neurosurgery	Jin Meihua	Huang Zhiyi	(lesions of the left lobe of the time and occipitum) microscopic findings showed dense distribution of heterogeneous tumor cells, obvious nuclear atypia, obvious bleeding, necrosis, and microangioplasia. Combined with clinical history and immunohistochemical results, these findings were consistent with high-grade glioma, NOS, CNS WHO grade 3-4, and molecular detection was recommended to different…	2022-06-10 17:55
2215214	***	female	78 years old	0000829549	Yang Baohua	2022-06-02 09:56	This court	neurosurgery	Jin Meihua	Zhou Yingqiong	(right temporal occipito-lobe occupying) Under the examination tissue microscope, the tumor cells showed obvious atypia, nuclear pleomorphism, different nuclear sizes, more troll multinucleated giant cells, small fusiform cells, and local microangiogenesis, which was consistent with high-grade glioblastoma (glioblastoma), NOS, CNS WHO grade 4. It is suggested that adult glioma molecular detection…	2022-06-08 15:50
2211095	***	male	Nine years old	0000824834	Wei Shuyang	2022-04-21 16:06	This court	neurosurgery	Zhou Yingqiong	Zhang Yuanyin	(left frontal lobe mass) microscopic findings showed dense distribution of heterogeneous tumor cells, local multinucleoma giant cells, microangiogenesis and necrosis. Considering high-grade glioma, glioblastoma, NOS,CNS WHO grade 4, molecular detection of pediatric glioma is recommended for further integrated diagnosis. Immunohistochemical results: Tumor cells Vim (+), GFAP (+), Olig-2 (+), S100 …	2022-04-26 11:03
2207569	***	female	Sixty-five years old	0000819970	Jia Yuxi	2022-03-17 09:45	This court	neurosurgery	Jin Meihua	Du Xueli	(right porito-parietal occipitoccipito-occupying lobe) microscopic findings showed dense distribution of heterogeneous tumor cells, obvious nuclear atypia, microangiogenesis and necrosis, morphology consistent with glioblastoma, NOS, CNS WHO grade 4, it is recommended to conduct molecular detection of adult glioma for further integrated diagnosis. Immunohistochemical results: GFAP (+), ATRX (weak…	2022-03-22 15:05
2205482	***	female	21 years old	0000816838	Wei Shuyang	2022-02-28 09:47	This court	neurosurgery	Jin Meihua	Wang Shanhuan	(left frontoparietotemporal lobe tumor) Microscopic findings of heterogeneous tumor cells densely distributed, obvious nuclear atypia, microangiogenesis and necrosis, morphology consistent with glioblastoma, NOS, CNS WHO4 grade, if necessary to add molecular detection to exclude diffuse hemispheric glioma, CNS WHO4 grade. Immunohistochemical results: GFAP (+), S100 (-), IDH1 (-), ATRX (-) mutatio…	2022-03-03 18:26
2203482	***	male	69 years old	0000815404	Xia Xuewei	2022-02-09 09:35	This court	neurosurgery	Jin Meihua	Wang Shanhuan	(right temporal lobe occupying) microscopic examination showed dense distribution of local tumor cells, obvious cell heterotypes, frequent nuclear division, microangiogenesis and flaky-like necrosis, consistent with glioblastoma, NOS, CNS WHO grade 4, suggesting molecular detection of adult glioma for further integrated diagnosis. Immunohistochemical results: GFAP (+), Olig-2 scattered (+), ATRX …	2022-02-13 20:07
2201802	***	female	55 years old	0000489585	Liao Hongzhan	2022-01-19 09:34	This court	neurosurgery	Jin Meihua	Huang Zhiyi	(left parietal occipitral space occupying) the tumor cells showed obvious atypia, nuclear pleomorphism, microangiogenesis and necrosis. Considering high-grade glioma, glioblastoma, NOS,CNS WHO grade 4, molecular detection of adult glioma is recommended to further evaluate the prognosis and guide the clinic. Immunohistochemical results: Tumor cells GFAP (+), Olig-2 (+), ATRX weak (+), IDH1 (-), P5…	2022-01-24 18:13
2201444	***	female	56 years old	0000813135	Zheng Huaping	2022-01-15 10:51	This court	neurosurgery	Jin Meihua	Chen Chunyan	(left temporoparietal occupying lesion) most of the tissue submitted for examination was necrotic tissue, a few tumor cells were seen at the edge, the cell density increased, the cell atypia was visible, and the tumor cells invaded the brain surface, which was considered as high-grade glioma, glioblastoma, NOS, WHO Grade 4. Since Oligo-2 was not expressed in tumor cells and ATRX was weakly expres…	2022-01-20 19:33
