# Supplementary material for: Halofantrine up-regulates ATP6V0D2 mediating cytotoxic autophagy in glioblastoma and its mechanism
Source: Research Square preprint supplement (doi:10.21203/rs.3.rs-4335913/v1), 2024-05-13
Supplement: Supplementary file 2 [file 6027521a8b7133e6a71d3c07.xlsx]

## Sheet: Sheet1
Western blot
Anti-	Cat.No	company
LC3	ab192890	abcam
Beclin-1	ab302669	abcam
p62	ab109012	abcam
ATP6V0D2	ab236375	abcam
β-actin	ab8226	abcam
IHC
ATP6V0D2	ab236375	abcam
IF
LC3	ab192890	abcam
Goat anti-rabbit IgG H&L (Alexa Fluor® 488)	ab150077	abcam
